# Supplementary material
Source: PubMed Central journal article supplement (PMC4533067)
Supplement: Supp_Fig1.pdf [file Supp_Fig1.pdf]

## Supplementary Data

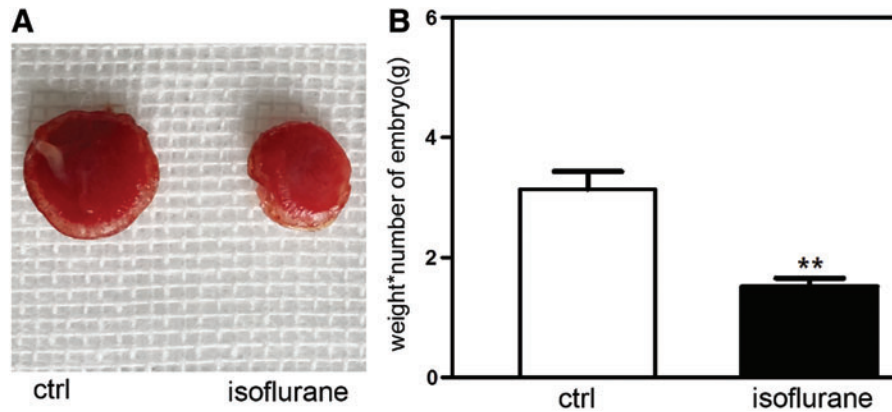

**SUPPLEMENTARY FIG. S1.** Anesthesia with 1.4% isoflurane for 2 h daily for 3 days reduced placenta growth at 18th day of pregnancy (A) Pictures of placenta. Ctrl means the placenta from a pregnant mouse without treatment. Isoflurane means the placenta from a pregnant mouse treated with 1.4% isoflurane. (B) Statistics of the placenta weights  $\times$  number of the control group or isoflurane group. Data shown are mean  $\pm$  SD ( $n=20$ ). \*\* $P < 0.01$ .
