# Supplementary material
Source: PubMed Central journal article supplement (PMC4533067)
Supplement: Supp_Fig2.pdf [file Supp_Fig2.pdf]

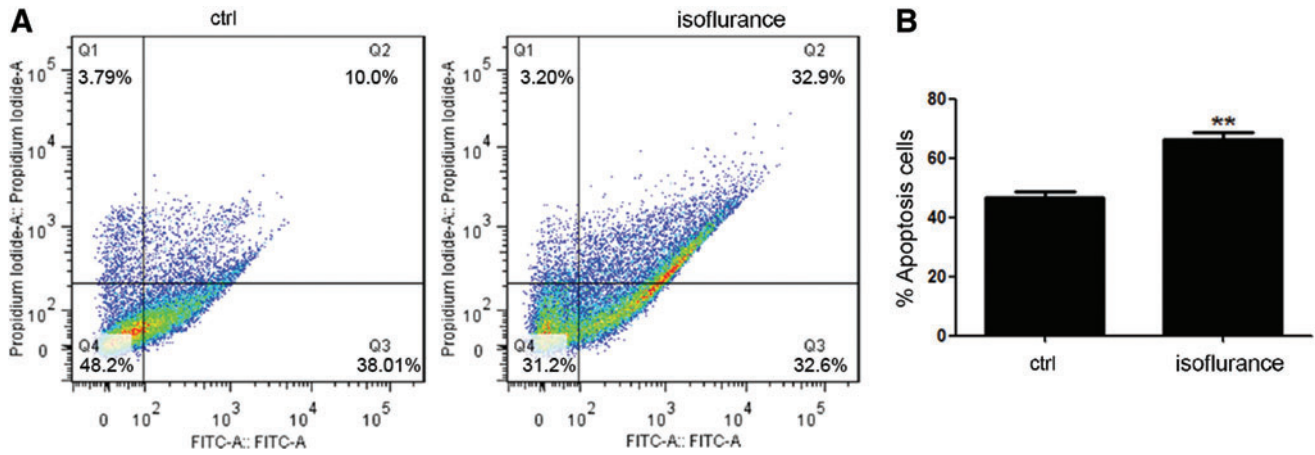

**SUPPLEMENTARY FIG. S2.** Six hours of treatment with isoflurane increased the apoptosis during neural differentiation (Fig. 2). **(A)** Cell apoptosis analysis of cells during neural differentiation from mES cells treated with isoflurane or control by FACS. **(B)** Statistics of the population of apoptotic cells. Data shown are mean  $\pm$  SD ( $n=3$ ).  $**P < 0.01$ . mES cells, mouse embryonic stem cells.
