# Supplementary material
Source: PubMed Central journal article supplement (PMC4533067)
Supplement: Supp_Fig3.pdf [file Supp_Fig3.pdf]

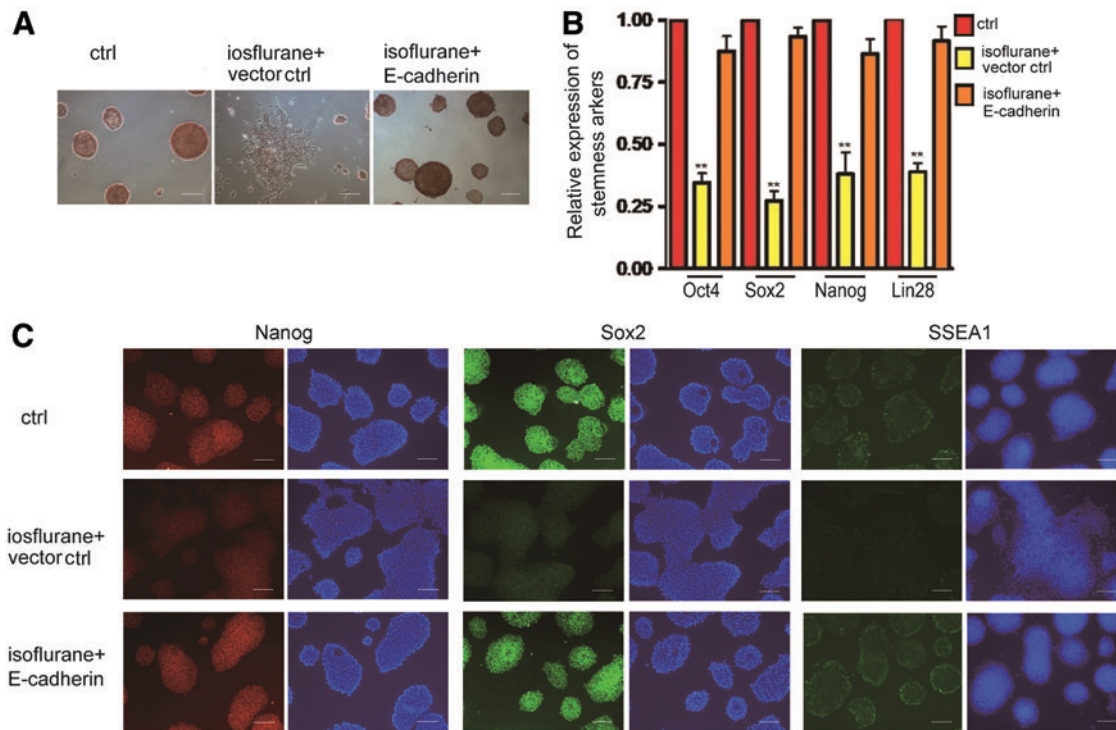

**SUPPLEMENTARY FIG. S3.** miR-9 inhibits the self-renewal of mES cells by targeting E-cadherin (Fig. 5). **(A)** E-cadherin restores the inhibition of isoflurane on self-renewal detected by AP staining. Ctrl means mES cells treated with no isoflurane and transfected with an empty control vector. **(B)** mRNA level of stemness markers detected by qRT-PCR in the rescue experiment. Data shown are mean  $\pm$  SD ( $n=3$ ).  $**P < 0.01$ . **(C)** Immunostaining of stemness markers, Nanog, Sox2, and SSEA1, in the rescue experiment. The scale bar represents 100  $\mu$ m. AP, alkaline phosphatase.
